# Supplementary material
Source: HighWire-hosted journal article supplement (https://erj.ersjournals.com/content/57/4/2000768)
Supplement: inline-supplementary-material-2 [file inline-supplementary-material-2.pdf]

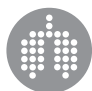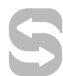

SHAREABLE PDF

# Effective control of *Staphylococcus aureus* lung infection despite tertiary lymphoid structure disorganisation

Lucile Regard<sup>1,2</sup>, Clémence Martin<sup>1,2</sup>, Jean-Luc Teillaud<sup>3,4</sup>,  
Hélène Lafoeste<sup>1,2</sup>, Hugues Vicaire<sup>1,2</sup>, Maha Zohra Ladjemi<sup>1</sup>,  
Emilie Ollame-Omvane<sup>5</sup>, Sophie Sibéril<sup>5,6</sup> and Pierre-Régis Burgel<sup>1,2,6</sup>

**Affiliations:** <sup>1</sup>Institut Cochin and Université de Paris, INSERM U1016, Paris, France. <sup>2</sup>Service de Pneumologie, Hôpital Cochin, AP-HP, Paris, France. <sup>3</sup>Laboratory "Immune Microenvironment and Immunotherapy", Centre d'Immunologie et des Maladies Infectieuses (CIMI), Paris, France. <sup>4</sup>INSERM UMRS 1135, Faculté de Médecine, Sorbonne Université, Paris, France. <sup>5</sup>Centre de Recherche des Cordeliers, INSERM, Sorbonne Université, Université de Paris, Paris, France. <sup>6</sup>These authors contributed equally to this work.

**Correspondence:** Pierre-Régis Burgel, 27, rue du Faubourg Saint Jacques, 75014 Paris, France.  
E-mail: pierre-regis.burgel@aphp.fr

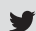

@ERSpublications

**Disorganisation of peribronchial lymphoid follicles did not result in increased bacterial load nor in decreased survival in a mouse model of persistent lung infection. Lymphoid follicles may not be essential for controlling lung bacterial infection.** <https://bit.ly/3lOgNEG>

**Cite this article as:** Regard L, Martin C, Teillaud J-L, *et al.* Effective control of *Staphylococcus aureus* lung infection despite tertiary lymphoid structure disorganisation. *Eur Respir J* 2021; 57: 2000768 [https://doi.org/10.1183/13993003.00768-2020].

This single-page version can be shared freely online.

## ABSTRACT

**Background:** Tertiary lymphoid structures (TLS) are triggered by persistent bronchopulmonary infection with *Staphylococcus aureus*, but their roles remain elusive. The present study sought to examine the effects of B- and/or T-cell depletion on *S. aureus* infection and TLS development (lymphoid neogenesis) in mice.

**Methods:** C57Bl/6 mice were pre-treated with 1) an anti-CD20 monoclonal antibody (mAb) (B-cell depletion) or 2) an anti-CD4 and/or an anti-CD8 mAb (T-cell depletion) or 3) a combination of anti-CD20, anti-CD4 and anti-CD8 mAbs (combined B- and T-cell depletion) or 4) isotype control mAbs. After lymphocyte depletion, mice were infected by intratracheal instillation of agarose beads containing *S. aureus* ( $10^6$  CFU per mouse). 14 days later, bacterial load and lung inflammatory cell infiltration were assessed by cultures and immunohistochemistry, respectively.

**Results:** 14 days after *S. aureus*-bead instillation, lung bacterial load was comparable between control and lymphocyte-depleted mice. While TLS were observed in the lungs of infected mice pre-treated with control mAbs, these structures were disorganised or abolished in the lungs of lymphocyte-depleted mice. The absence of CD20<sup>+</sup> B-lymphocytes had no effect on CD3<sup>+</sup> T-lymphocyte infiltration, whereas CD4<sup>+</sup>/CD8<sup>+</sup> T-cell depletion markedly reduced CD20<sup>+</sup> B-cell infiltration. Depletion of CD4<sup>+</sup> or CD8<sup>+</sup> T-cells separately had limited effect on B-cell infiltration, but led to the absence of germinal centres.

**Conclusion:** TLS disorganisation is not associated with loss of infection control in mice persistently infected with *S. aureus*.
